# Supplementary material
Source: MDPI journal article supplement (https://www.mdpi.com/2072-4292/13/18/3759)
Supplement: s1 [file s1 › remotesensing-1351582-SI.pdf]

## Supplementary Material for

### Evolution of the Chongce Glacier in the northwestern Tibetan

#### Plateau during 1970-2020

Yongling Sun<sup>1</sup>, Lin Liu<sup>2\*</sup>, Yuanyuan Pei<sup>3</sup> and Kai Wang<sup>1</sup>

<sup>1</sup> School of Civil Architectural Engineering, Shandong University of Technology, Zibo 255000, Shandong, China; sunyongling11@mails.ucas.ac.cn (Y. S.); wk92193781@163.com (K. W.)

<sup>2</sup> MOE Key Laboratory of Fundamental Physical Quantities Measurement and Hubei Key Laboratory of Gravitation and Quantum Physics, PGMF and School of Physics, Huazhong University of Science and Technology, Wuhan 430074, Hubei, China; liulin616@hust.edu.cn (L. L.)

<sup>3</sup> School of Civil Engineering, Anhui Jianzhu University, Hefei 230601, Anhui, China; pei\_yuanyuan@163.com (Y. P.)

\* Correspondence: liulin616@hust.edu.cn

**Table S1.** Landsat image pairs used for velocity determination in this study.

| No. | Sensor | Date1      | Date2      | Resolution<br>(m) | Time<br>Span<br>(day) |
|-----|--------|------------|------------|-------------------|-----------------------|
| 1   | TM-TM  | 1990-02-16 | 1991-02-19 | 30                | 368                   |
| 2   | TM-TM  | 1991-02-19 | 1992-02-22 | 30                | 368                   |
| 3   | TM-TM  | 1992-02-22 | 1993-02-24 | 30                | 368                   |
| 4   | TM-TM  | 1993-01-23 | 1993-12-25 | 30                | 336                   |
| 5   | TM-TM  | 1993-01-23 | 1993-04-29 | 30                | 96                    |
| 6   | TM-TM  | 1993-12-09 | 1993-12-25 | 30                | 16                    |
| 7   | TM-TM  | 1994-05-18 | 1994-06-19 | 30                | 32                    |
| 8   | TM-TM  | 1994-10-09 | 1994-10-25 | 30                | 16                    |
| 9   | TM-TM  | 1994-10-09 | 1994-12-12 | 30                | 64                    |
| 10  | TM-TM  | 1994-10-25 | 1994-12-12 | 30                | 48                    |
| 11  | TM-TM  | 1994-12-12 | 1995-03-18 | 30                | 96                    |
| 12  | TM-TM  | 1996-03-04 | 1996-05-07 | 30                | 64                    |
| 13  | TM-TM  | 1996-03-04 | 1996-09-12 | 30                | 192                   |
| 14  | TM-TM  | 1996-03-04 | 1996-10-30 | 30                | 240                   |
| 15  | TM-TM  | 1996-03-04 | 1996-11-15 | 30                | 256                   |
| 16  | TM-TM  | 1996-03-04 | 1996-12-01 | 30                | 272                   |
| 17  | TM-TM  | 1996-05-07 | 1996-09-12 | 30                | 128                   |
| 18  | TM-TM  | 1996-05-07 | 1996-10-30 | 30                | 176                   |
| 19  | TM-TM  | 1996-05-07 | 1996-11-15 | 30                | 192                   |
| 20  | TM-TM  | 1996-05-07 | 1996-12-01 | 30                | 208                   |
| 21  | TM-TM  | 1996-09-12 | 1996-10-30 | 30                | 48                    |
| 22  | TM-TM  | 1996-09-12 | 1996-11-15 | 30                | 64                    |
| 23  | TM-TM  | 1996-09-12 | 1996-12-01 | 30                | 80                    |
| 24  | TM-TM  | 1996-10-30 | 1996-12-01 | 30                | 32                    |
| 25  | TM-TM  | 1996-12-01 | 1997-11-02 | 30                | 336                   |
| 26  | TM-TM  | 1997-01-02 | 1997-02-03 | 30                | 32                    |

|    |           |            |            |    |     |
|----|-----------|------------|------------|----|-----|
| 27 | TM-TM     | 1997-02-03 | 1997-10-01 | 30 | 240 |
| 28 | TM-TM     | 1997-10-01 | 1997-11-02 | 30 | 32  |
| 29 | TM-TM     | 1997-10-01 | 1998-10-04 | 30 | 368 |
| 30 | TM-ETM+   | 1997-10-01 | 1999-10-31 | 30 | 760 |
| 31 | TM-ETM+   | 1998-10-04 | 1999-09-29 | 30 | 360 |
| 32 | ETM+-ETM+ | 1999-10-31 | 2001-10-20 | 15 | 720 |
| 33 | ETM+-ETM+ | 2000-12-04 | 2001-10-20 | 15 | 320 |
| 34 | ETM+-ETM+ | 2001-10-20 | 2002-11-24 | 15 | 400 |
| 35 | ETM+-ETM+ | 2002-03-29 | 2003-04-01 | 15 | 368 |
| 36 | TM-TM     | 2007-09-27 | 2009-10-02 | 30 | 736 |
| 37 | TM-TM     | 2008-12-18 | 2010-12-24 | 30 | 736 |
| 38 | TM-TM     | 2009-11-03 | 2011-11-09 | 30 | 736 |
| 39 | TM-TM     | 2010-07-17 | 2011-08-05 | 30 | 384 |
| 40 | TM-OLI    | 2011-11-09 | 2013-11-30 | 30 | 752 |
| 41 | OLI-OLI   | 2013-09-27 | 2014-09-30 | 15 | 368 |
| 42 | OLI-OLI   | 2014-11-17 | 2015-11-20 | 15 | 368 |
| 43 | OLI-OLI   | 2015-12-06 | 2016-12-08 | 15 | 368 |
| 44 | OLI-OLI   | 2016-09-19 | 2017-09-22 | 15 | 368 |
| 45 | OLI-OLI   | 2017-09-22 | 2018-09-25 | 15 | 368 |
| 46 | OLI-OLI   | 2018-06-05 | 2020-06-26 | 15 | 752 |

**Table S2.** Landsat images used for terminus delineation in this study.

| No. | Senser | Date       | Resolution (m) |
|-----|--------|------------|----------------|
| 1   | MSS    | 1977-06-23 | 30             |
| 2   | TM     | 1990-02-16 | 30             |
| 3   | TM     | 1995-03-18 | 30             |
| 4   | TM     | 1995-12-31 | 30             |
| 5   | TM     | 1996-09-12 | 30             |
| 6   | TM     | 1996-12-01 | 30             |
| 7   | TM     | 1997-02-03 | 30             |
| 8   | TM     | 1997-10-01 | 30             |
| 9   | ETM+   | 1999-09-29 | 15             |
| 10  | TM     | 2008-11-16 | 30             |
| 11  | OLI    | 2020-09-30 | 15             |

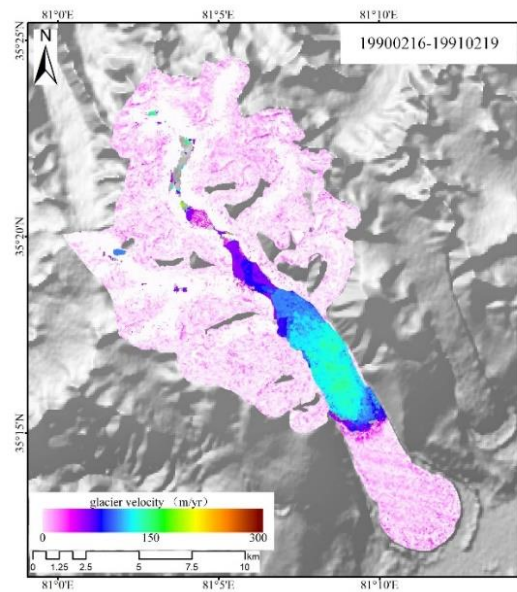

**Figure S1.** Flow velocities of the Chongce Glacier during the period of 19900216-19910219.

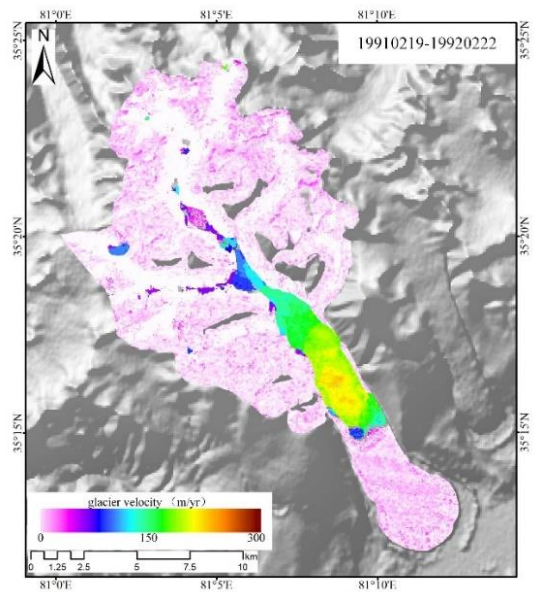

**Figure S2.** Flow velocities of the Chongce Glacier during the period of 19910219-19920222.

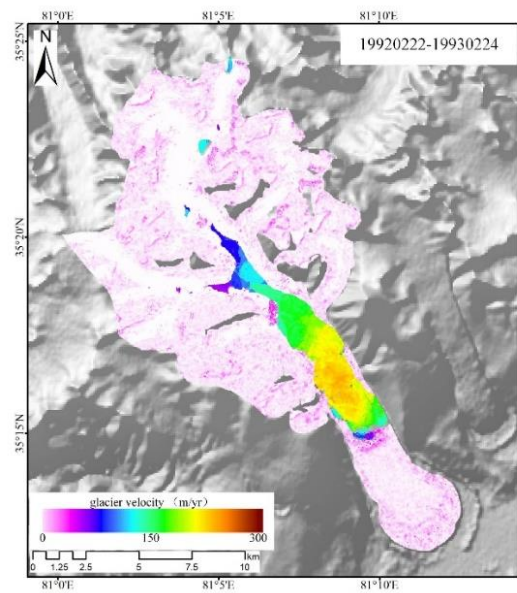

**Figure S3.** Flow velocities of the Chongce Glacier during the period of 19920222-19930224.

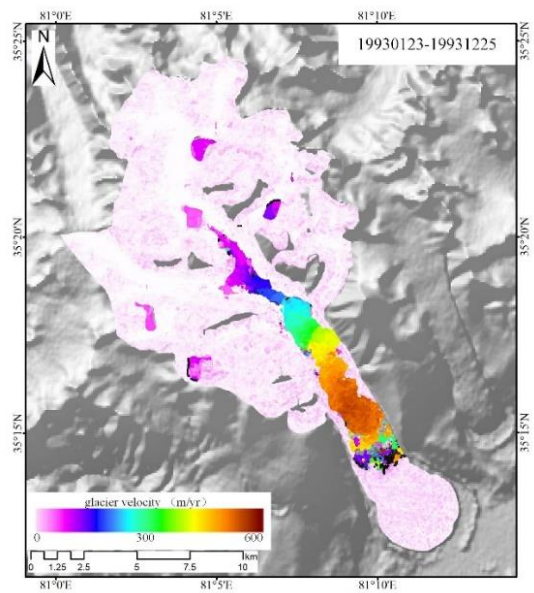

**Figure S4.** Flow velocities of the Chongce Glacier during the period of 19930123-19931225.

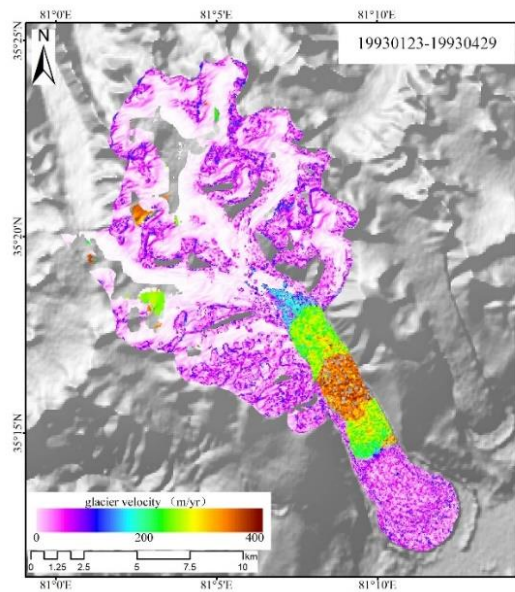

**Figure S5.** Flow velocities of the Chongce Glacier during the period of 19930123-19930429.

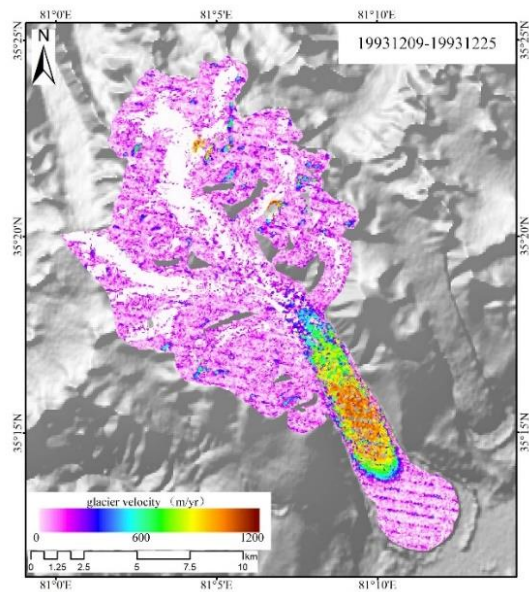

**Figure S6.** Flow velocities of the Chongce Glacier during the period of 19931209-19931225.

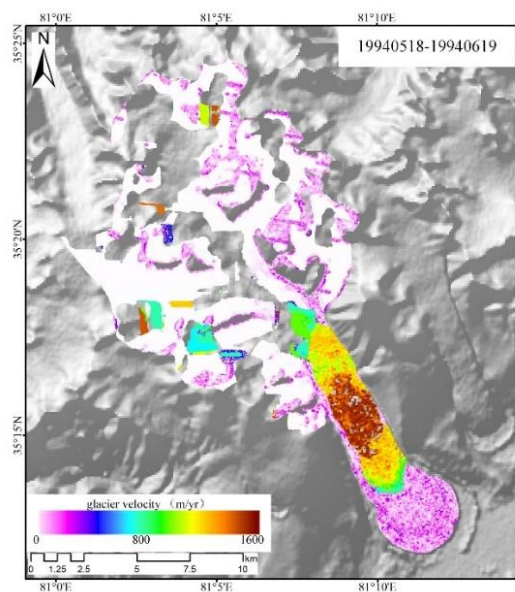

**Figure S7.** Flow velocities of the Chongce Glacier during the period of 19940518-19940619.

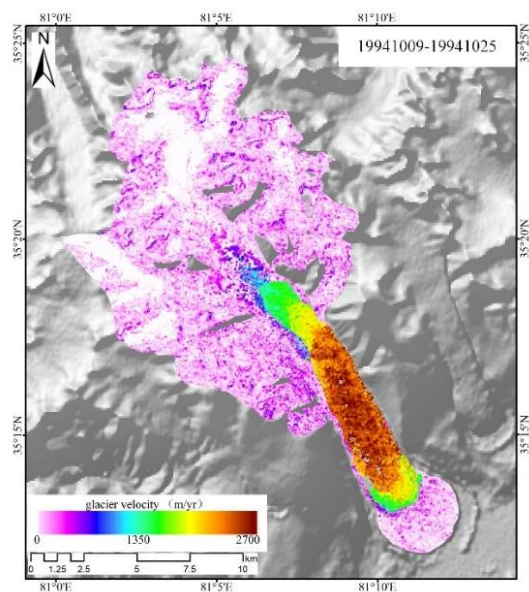

**Figure S8.** Flow velocities of the Chongce Glacier during the period of 19941009-19941025.

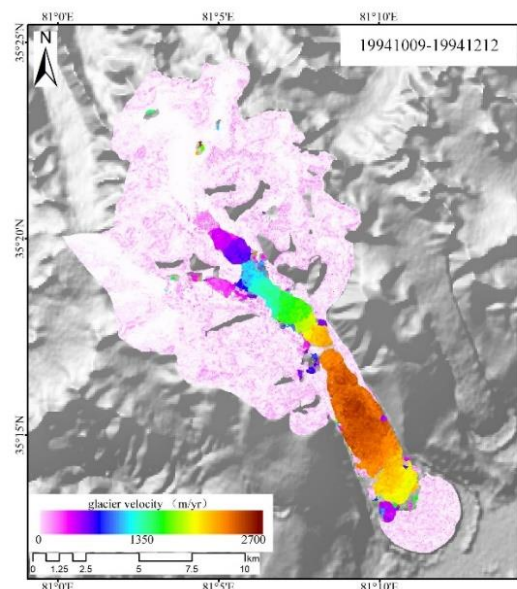

**Figure S9.** Flow velocities of the Chongce Glacier during the period of 19941009-19941212.

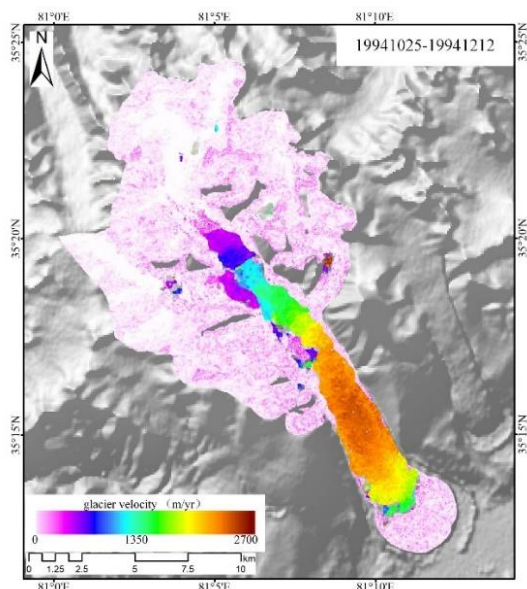

**Figure S10.** Flow velocities of the Chongce Glacier during the period of 19941025-19941212.

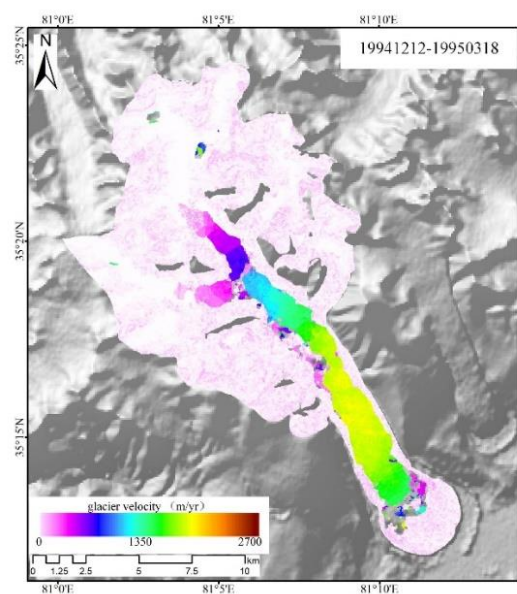

**Figure S11.** Flow velocities of the Chongce Glacier during the period of 19941212-19950318.

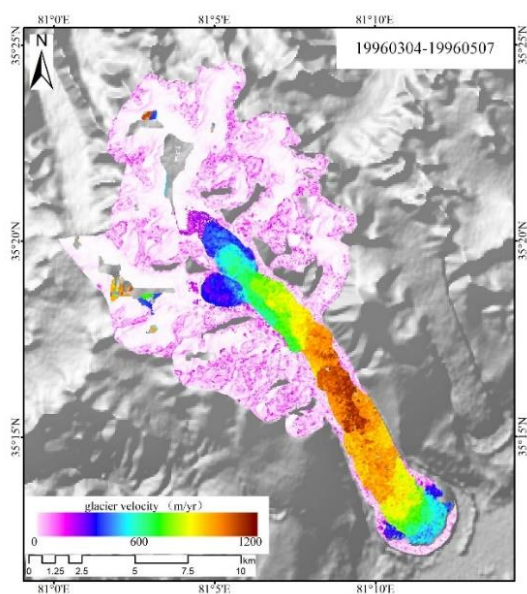

**Figure S12.** Flow velocities of the Chongce Glacier during the period of 19960304-19960507.

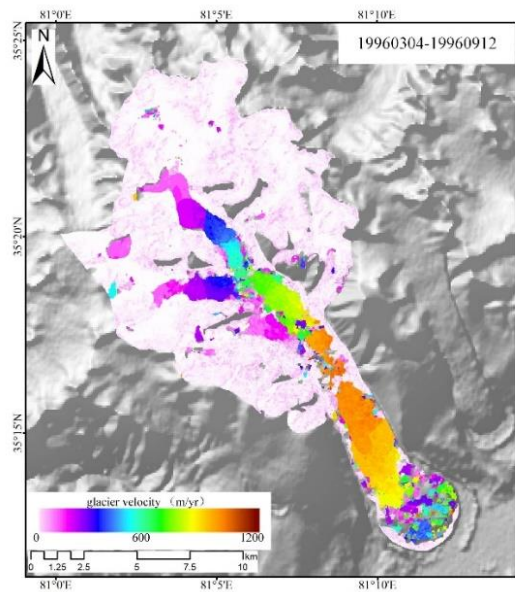

**Figure S13.** Flow velocities of the Chongce Glacier during the period of 19960304-19960912.

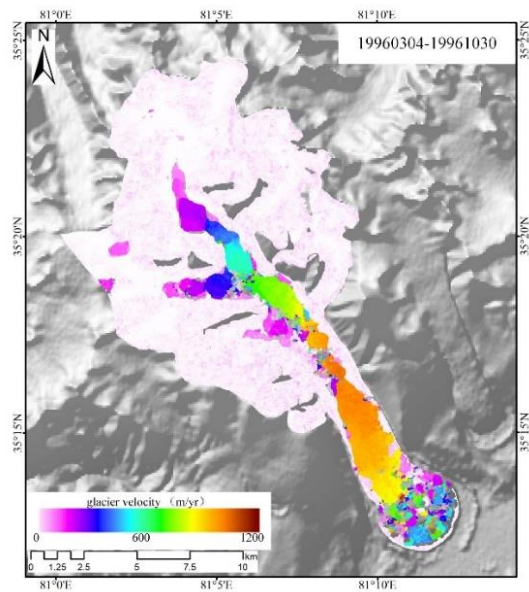

**Figure S14.** Flow velocities of the Chongce Glacier during the period of 19960304-19961030.

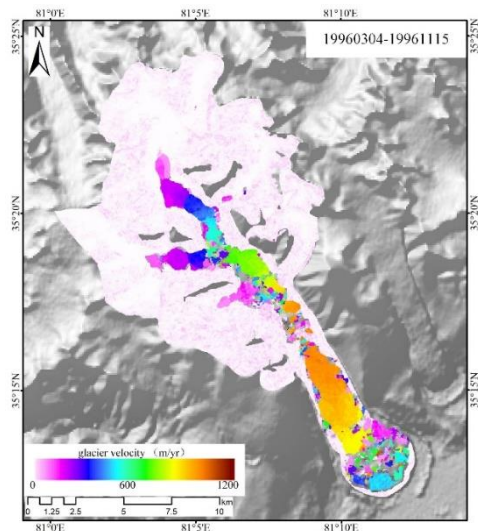

**Figure S15.** Flow velocities of the Chongce Glacier during the period of 19960304-19961115.

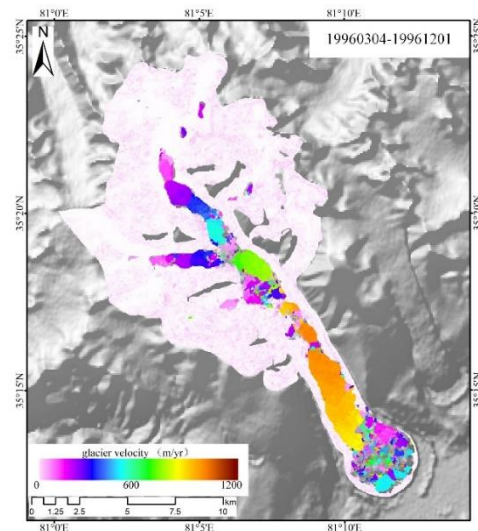

**Figure S16.** Flow velocities of the Chongce Glacier during the period of 19960304-19961201.

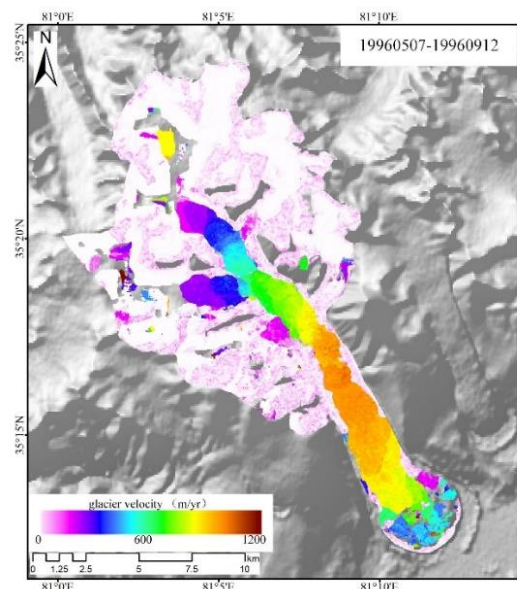

**Figure S17.** Flow velocities of the Chongce Glacier during the period of 19960507-19960912.

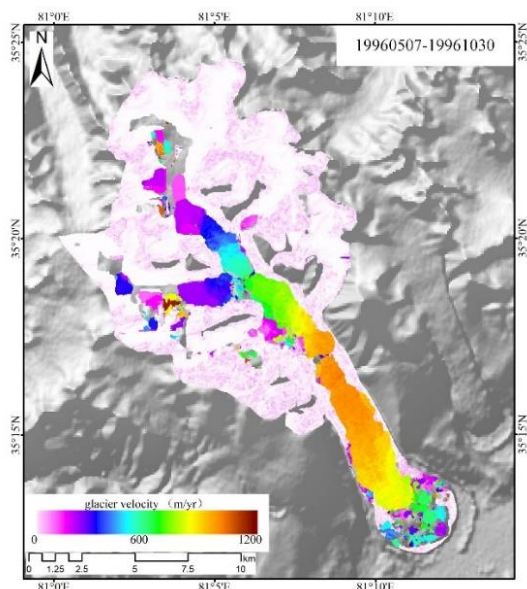

**Figure S18.** Flow velocities of the Chongce Glacier during the period of 19960507-19961030.

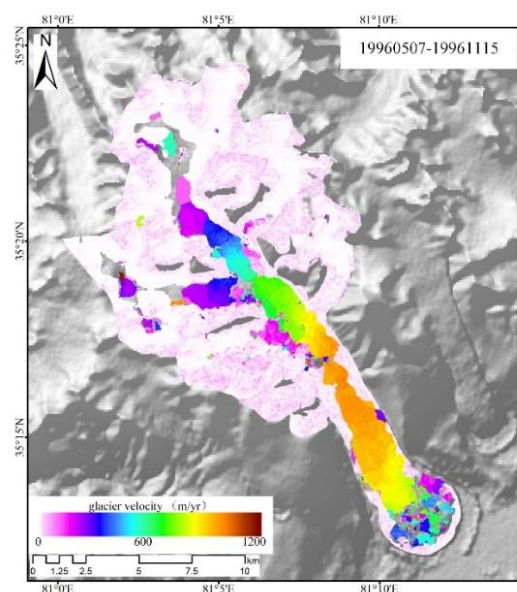

**Figure S19.** Flow velocities of the Chongce Glacier during the period of 19960507-19961115.

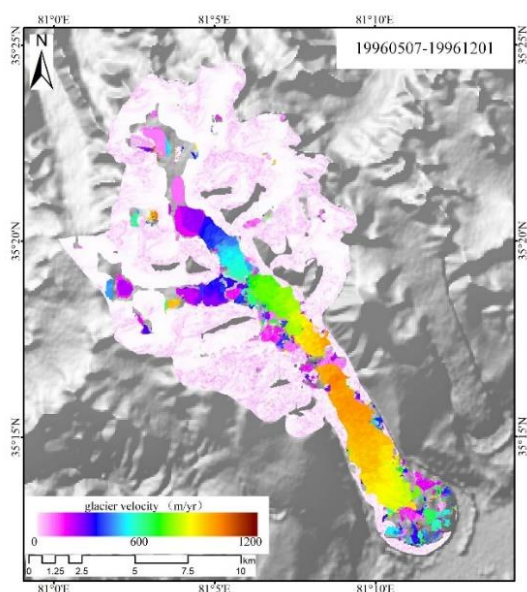

**Figure S20.** Flow velocities of the Chongce Glacier during the period of 19960507-19961201.

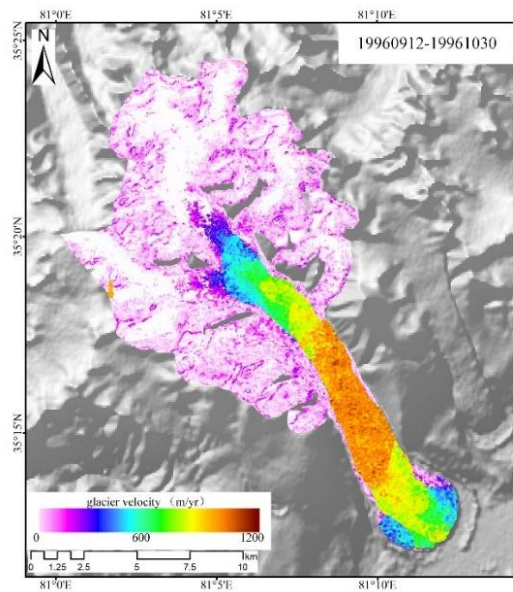

**Figure S21.** Flow velocities of the Chongce Glacier during the period of 19960912-19961030.

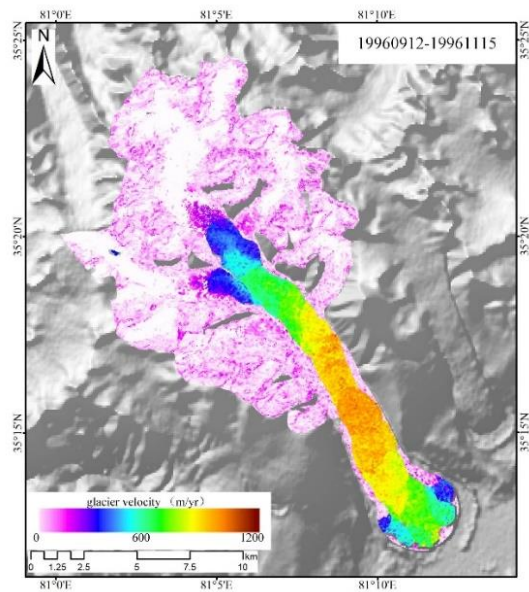

**Figure S22.** Flow velocities of the Chongce Glacier during the period of 19960912-19961115.

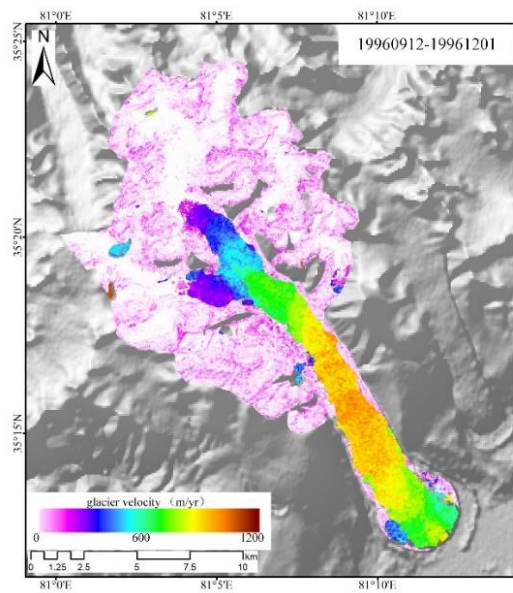

**Figure S23.** Flow velocities of the Chongce Glacier during the period of 19960912-19961201.

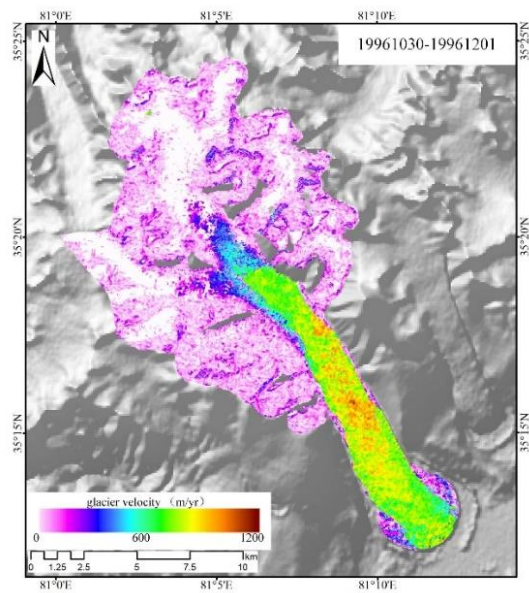

**Figure S24.** Flow velocities of the Chongce Glacier during the period of 19961030-19961201.

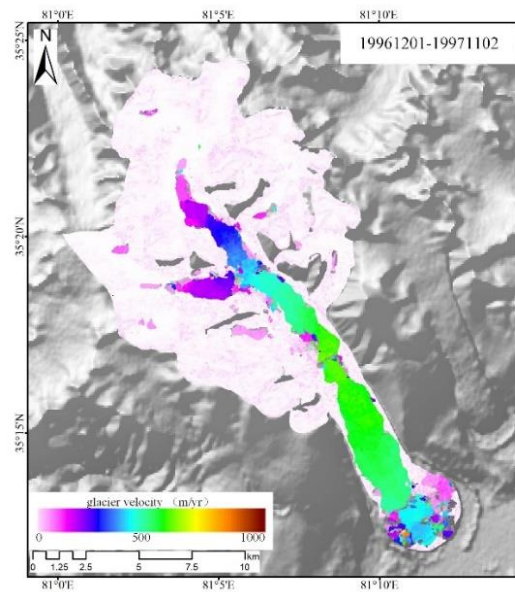

**Figure S25.** Flow velocities of the Chongce Glacier during the period of 19961201-19971102.

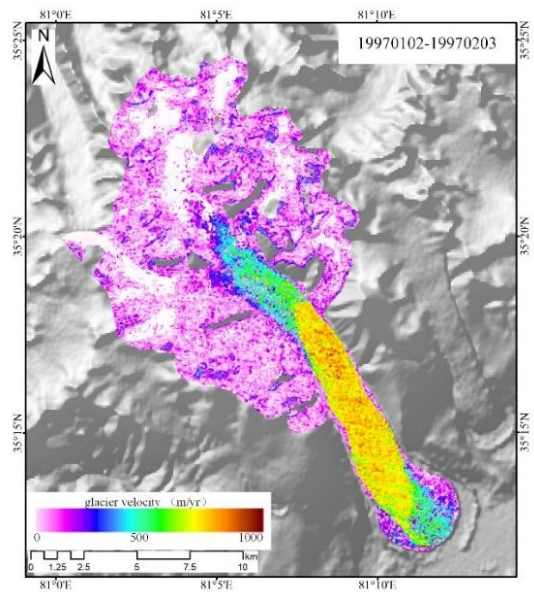

**Figure S26.** Flow velocities of the Chongce Glacier during the period of 19970102-19970203.

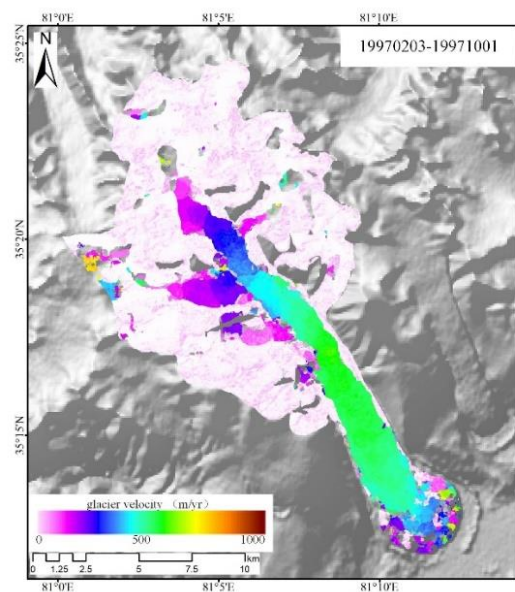

**Figure S27.** Flow velocities of the Chongce Glacier during the period of 19970203-19971001.

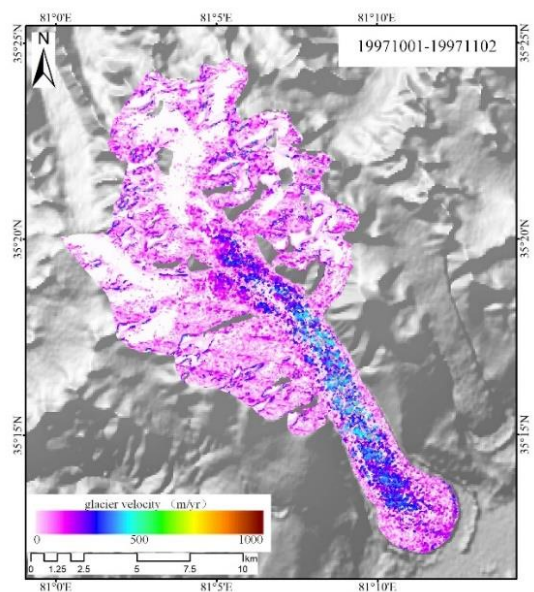

**Figure S28.** Flow velocities of the Chongce Glacier during the period of 19971001-19971102.

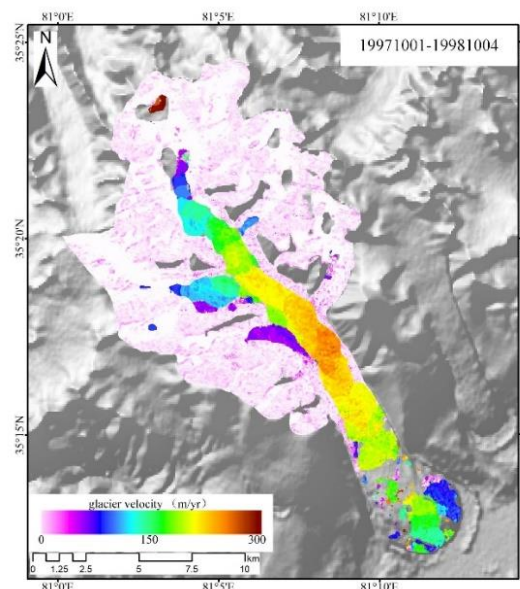

**Figure S29.** Flow velocities of the Chongce Glacier during the period of 19971001-19981004.

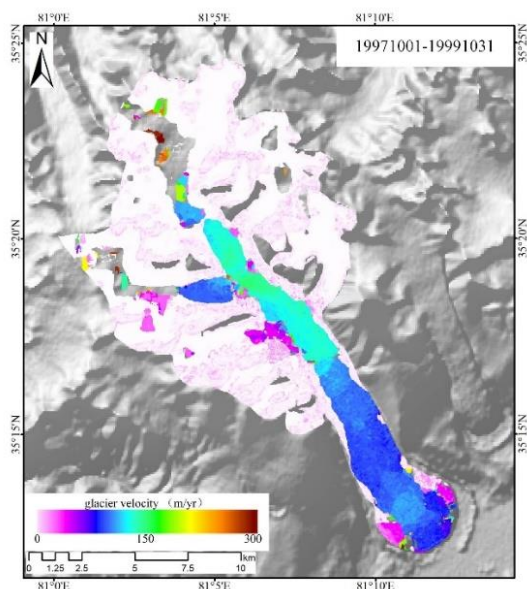

**Figure S30.** Flow velocities of the Chongce Glacier during the period of 19971001-19991031.

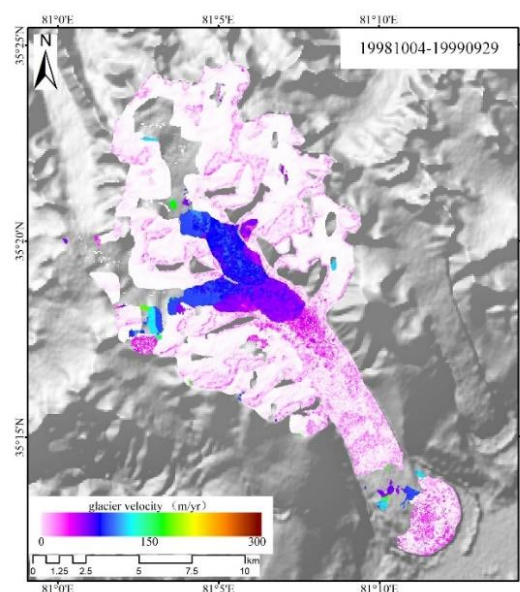

**Figure S31.** Flow velocities of the Chongce Glacier during the period of 19981004-19990929.

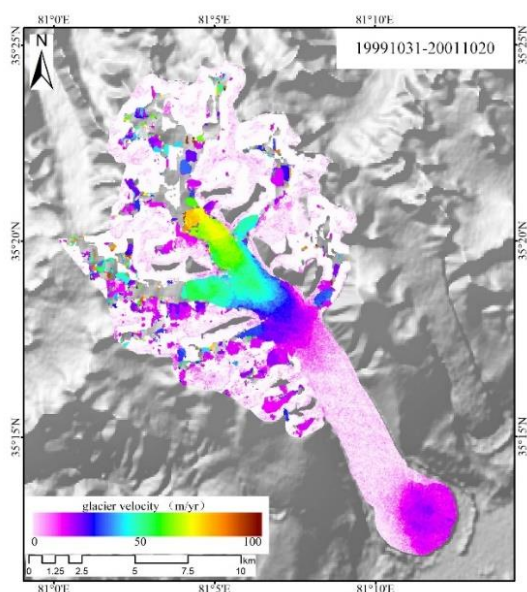

**Figure S32.** Flow velocities of the Chongce Glacier during the period of 19991031-20011020.

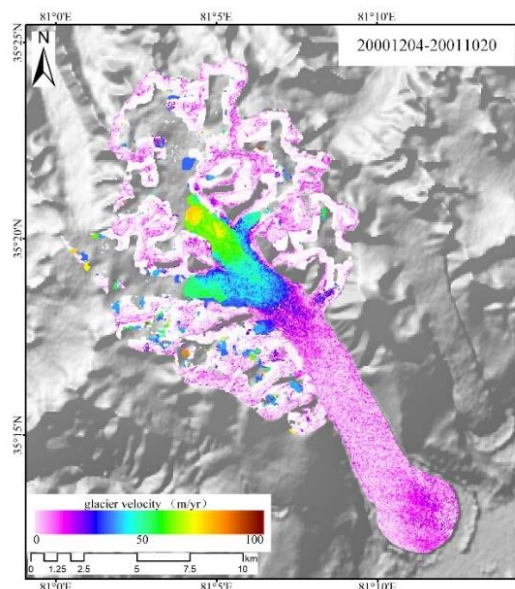

**Figure S33.** Flow velocities of the Chongce Glacier during the period of 20001204-20011020.

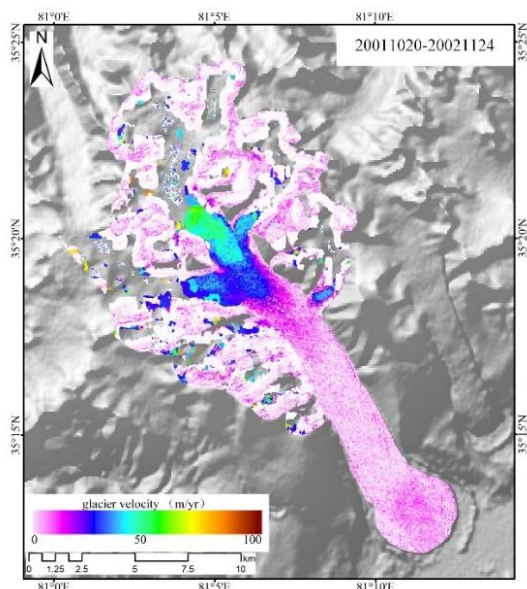

**Figure S34.** Flow velocities of the Chongce Glacier during the period of 20011020-20021124.

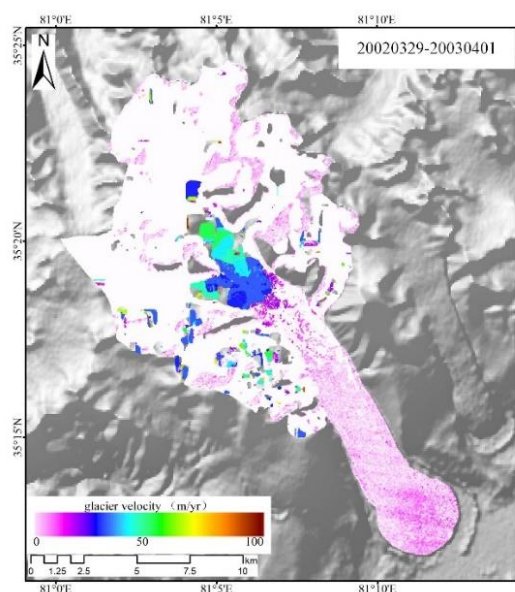

**Figure S35.** Flow velocities of the Chongce Glacier during the period of 20020329-20030401.

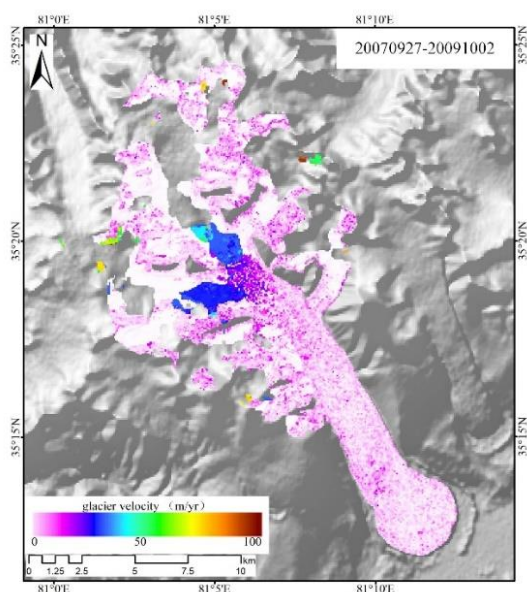

**Figure S36.** Flow velocities of the Chongce Glacier during the period of 20070927-20091002.

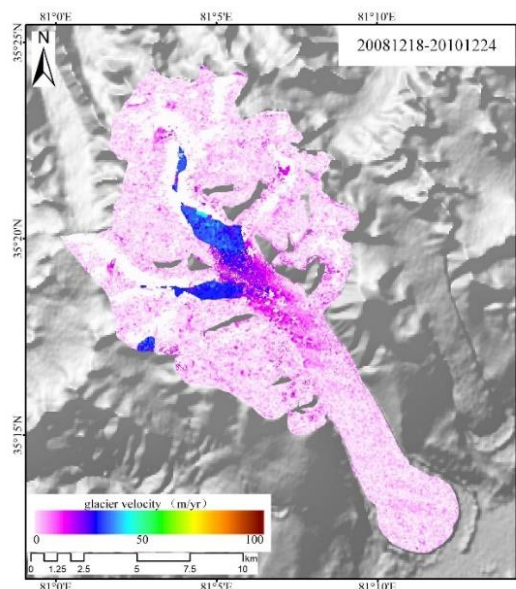

**Figure S37.** Flow velocities of the Chongce Glacier during the period of 20081218-20101224.

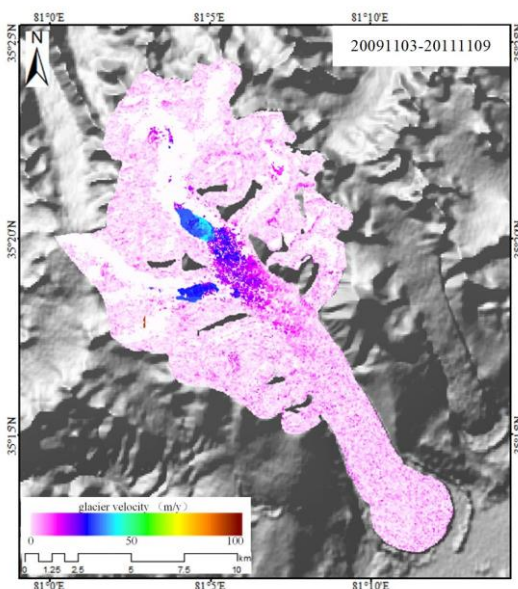

**Figure S38.** Flow velocities of the Chongce Glacier during the period of 20091103-20111109.

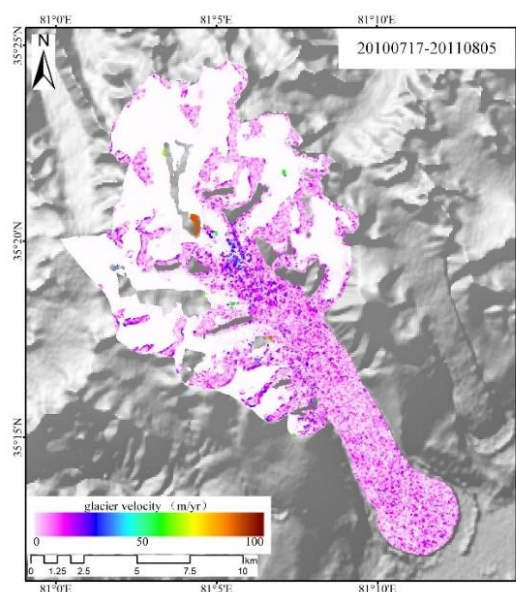

**Figure S39.** Flow velocities of the Chongce Glacier during the period of 20100717-20110805.

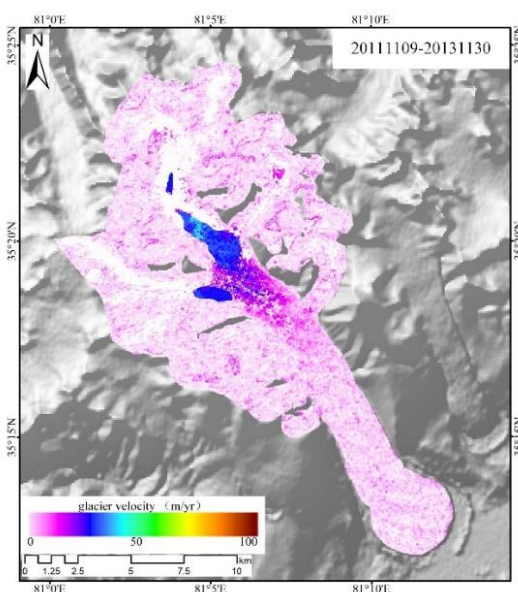

**Figure S40.** Flow velocities of the Chongce Glacier during the period of 20111109-20131130.

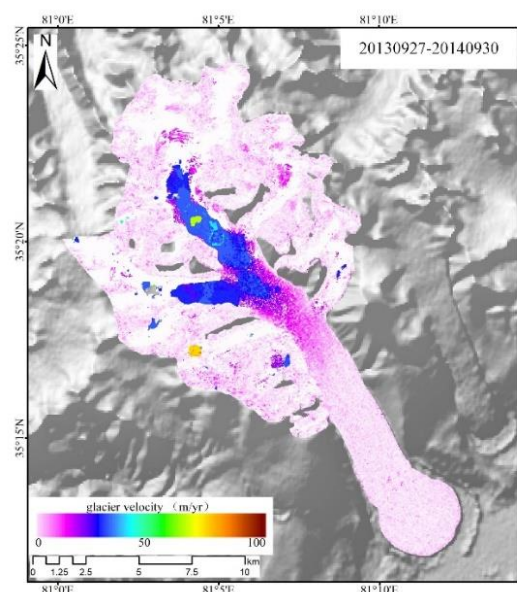

**Figure S41.** Flow velocities of the Chongce Glacier during the period of 20130927-20140930.

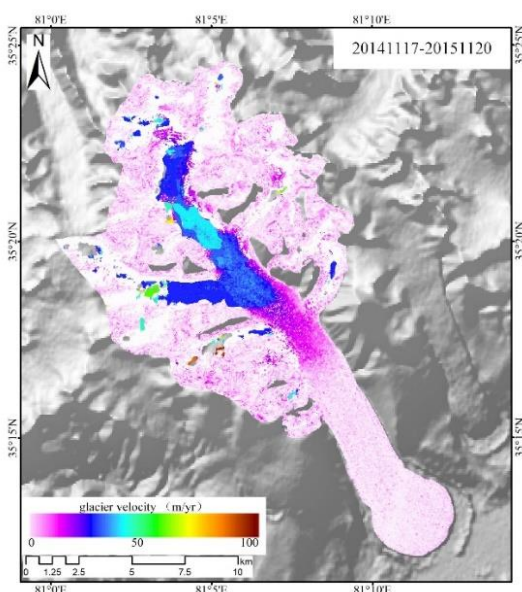

**Figure S42.** Flow velocities of the Chongce Glacier during the period of 20141117-20151120.

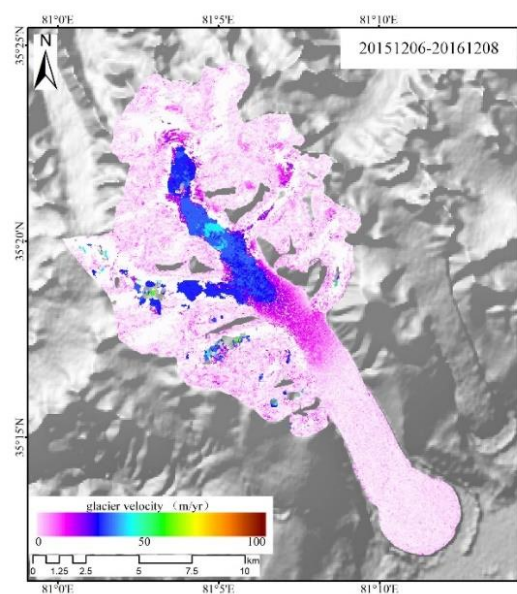

**Figure S43.** Flow velocities of the Chongce Glacier during the period of 20151206-20161208.

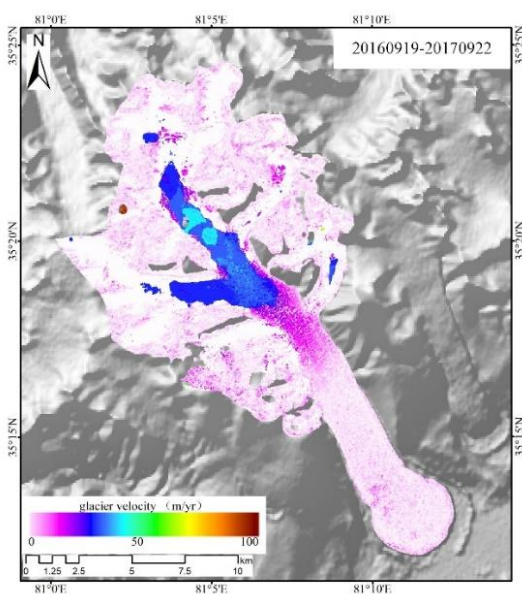

**Figure S44.** Flow velocities of the Chongce Glacier during the period of 20160919-20170922.

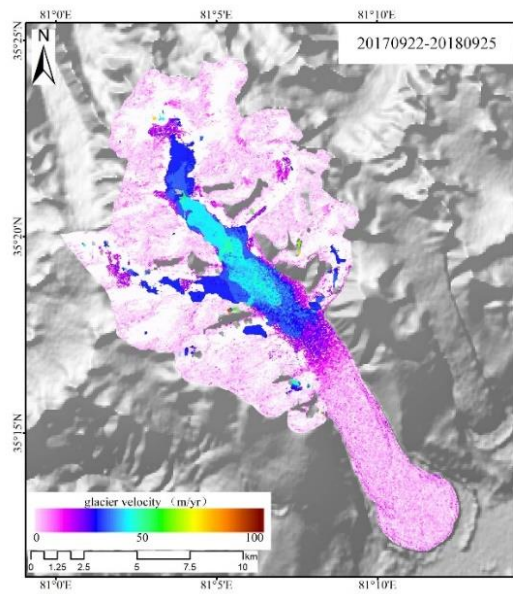

**Figure S45.** Flow velocities of the Chongce Glacier during the period of 20170922-20180925.

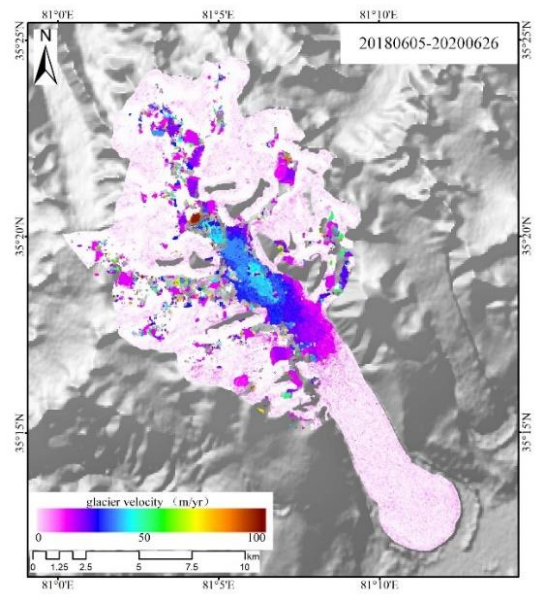

**Figure S46.** Flow velocities of the Chongce Glacier during the period of 20180605-20200626.
